# Supplementary material
Source: PubMed Central journal article supplement (PMC6990965)
Supplement: jamasurg-155-206-s001.pdf [file jamasurg-155-206-s001.pdf]

## Supplementary Online Content

Veld JV, Amelung FJ, Borstlap WAA, et al; Dutch Snapshot Research Group. Comparison of decompressing stoma vs stent as a bridge to surgery for left-sided obstructive colon cancer. *JAMA Surg*. Published online January 8, 2020. doi:10.1001/jamasurg.2019.5466

**eTable 1.** Comparison of Baseline Characteristics Between Selected Patients Versus Unselected Patients After Propensity Score Matching, for DS and SEMS Separately

**eTable 2.** DS-Related Complications

**eTable 3.** SEMS-Specific Outcomes

**eTable 4.** Sub Analysis of Either Blowhole or Double Loop DS Versus SEMS Patients

**eTable 5.** Comparison of SEMS Patients in High-Volume Versus Low-Volume SEMS Centers

**eFigure 1.** Disease Free Survival (2A) and Overall Survival (2B) for DS Versus SEMS as BTS, Truncated at a Third of Patients at Risk (Propensity-Score Matched Samples)

**eFigure 2.** Stoma-Free Survival After Resection for DS Versus SEMS as BTS (Propensity-Score Matched)

**eFigure 3.** Flowchart of Patients With a Stoma In Situ Directly After Resection

**eFigure 4.** Disease Free Survival (3A) and Overall Survival (3B) Following SEMS Placement for High-Volume Versus Low-Volume SEMS Centers

This supplementary material has been provided by the authors to give readers additional information about their work.

**eTable 1.** Comparison of baseline characteristics between selected patients versus unselected patients after propensity score matching, for DS and SEMS separately.

|                                          | DS as BTS               |                           |        | SEMS as BTS             |                          |        |
|------------------------------------------|-------------------------|---------------------------|--------|-------------------------|--------------------------|--------|
|                                          | Selected<br>N = 121 (%) | Unselected<br>N = 119 (%) | P      | Selected<br>N = 121 (%) | Unselected<br>N = 82 (%) | P      |
| <b>Male sex</b>                          | 72 (59.5)               | 77 (64.7)                 | 0.41   | 73 (60.3)               | 42 (51.2)                | 0.20   |
| <b>Age, mean (SD), years</b>             | 69.8 (11.0)             | 67.2 (11.7)               | 0.07   | 70.1 (12.1)             | 71.1 (11.2)              | 0.57   |
| <b>BMI, mean (SD), kg/m<sup>2</sup></b>  | 25.3 (4.3)              | 24.6 (3.6)                | 0.09   | 25.2 (3.9)              | 26.3 (6.5)               | 0.11   |
| <b>ASA score 3-4</b>                     | 26 (21.5)               | 27 (22.7)                 | 0.82   | 26 (21.5)               | 22 (26.8)                | 0.38   |
| <b>Prior abdominal surgery</b>           | 36 (29.8)               | 52 (43.7)                 | 0.03   | 32 (26.4)               | 11 (13.4)                | 0.03   |
| <b>Tumor location</b>                    |                         |                           | <0.001 |                         |                          | 0.13   |
| Splenic flexure                          | 6 (5.0)                 | 36 (30.3)                 |        | 8 (6.6)                 | 2 (2.4)                  |        |
| Descending colon                         | 23 (19.0)               | 21 (17.6)                 |        | 18 (14.9)               | 20 (24.4)                |        |
| Sigmoid                                  | 92 (76.0)               | 62 (52.1)                 |        | 95 (78.5)               | 60 (73.2)                |        |
| <b>pN stage</b>                          |                         |                           | 0.22   |                         |                          | 0.04   |
| pN0                                      | 51 (42.1)               | 44 (37.0)                 |        | 54 (44.6)               | 49 (59.8)                |        |
| pN1                                      | 47 (38.8)               | 41 (34.5)                 |        | 42 (34.7)               | 26 (31.7)                |        |
| pN2                                      | 23 (19.0)               | 34 (28.6)                 |        | 25 (20.7)               | 7 (8.5)                  |        |
| <b>cM1 stage</b>                         |                         |                           | 0.32   |                         |                          | 0.56   |
| Lung                                     | 0 (0.0)                 | 1 (0.8)                   |        | 1 (0.8)                 | 0 (0.0)                  |        |
| Liver                                    | 10 (8.3)                | 4 (3.4)                   |        | 5 (4.1)                 | 6 (7.3)                  |        |
| Peritoneal                               | 0 (0.0)                 | 3 (2.5)                   |        | 2 (1.7)                 | 1 (1.2)                  |        |
| Other                                    | 0 (0.0)                 | 1 (0.8)                   |        | 1 (0.8)                 | 1 (1.2)                  |        |
| <b>Length of stenosis, mean (SD), cm</b> | 4.1 (1.7)               | 4.6 (2.0)                 | 0.16   | 3.9 (1.5)               | 3.8 (1.6)                | 0.55   |
| <b>Year of resection<sup>a</sup></b>     |                         |                           | <0.001 |                         |                          | <0.001 |
| 2009                                     | 5 (31.3)                | 0 (0.0)                   |        | 11 (68.8)               | 35 (100)                 |        |
| 2010                                     | 17 (47.2)               | 0 (0.0)                   |        | 19 (52.8)               | 26 (100)                 |        |
| 2011                                     | 20 (69.0)               | 4 (25.0)                  |        | 9 (31.0)                | 12 (75.0)                |        |
| 2012                                     | 13 (39.4)               | 8 (53.3)                  |        | 20 (60.6)               | 7 (46.7)                 |        |
| 2013                                     | 25 (55.6)               | 14 (93.3)                 |        | 20 (44.4)               | 1 (6.7)                  |        |
| 2014                                     | 12 (75.0)               | 20 (100)                  |        | 4/ (25.0)               | 0 (0.0)                  |        |
| 2015                                     | 16 (45.7)               | 36 (97.3)                 |        | 19 (54.3)               | 1 (2.7)                  |        |
| 2016                                     | 13 (40.6)               | 37 (100)                  |        | 19 (59.4)               | 0 (0.0)                  |        |

PS = propensity-score, BTS = bridge to surgery, SEMS = self-expanding metal stent, SMD = standardized mean difference, SD = standard deviation, BMI = body mass index, ASA = American Society of Anesthesiologists

<sup>a</sup> Percentage of row instead of column total

**eTable 2. DS-related complications.**

|                                | <b>DS as BTS<br/>N = 121 (%)</b> |
|--------------------------------|----------------------------------|
| <b>DS-related complication</b> | 12/115 (10.4)                    |
| Stoma necrosis                 | 2/114 (1.8)                      |
| Abscess (intra-abdominal)      | 1/114 (0.9)                      |
| Bleeding                       | 1/114 (0.9)                      |
| Stoma prolaps                  | 1/114 (0.9)                      |
| Parastomal hernia              | 0/114 (0.0)                      |
| Retraction                     | 1/114 (0.0)                      |
| High output                    | 3/115 (2.6)                      |
| Other                          | 3/114 (2.6)                      |

DS = decompressing stoma, BTS = bridge to surgery

**eTable 3. SEMS-specific outcomes.**

|                                            | <b>SEMS as BTS<br/>N = 121 (%)</b> |
|--------------------------------------------|------------------------------------|
| <b>Technical success</b>                   | 102/119 (85.7)                     |
| <b>Reason for technical failure</b>        |                                    |
| Guidewire does not pass tumor              | 6/17 (35.3)                        |
| Stent does not pass tumor                  | 4/17 (23.6)                        |
| No proper stent deployment                 | 3/17 (17.6)                        |
| Perforation                                | 2/17 (11.8)                        |
| Unknown                                    | 2/17 (11.8)                        |
| <b>SEMS-related complication</b>           | 7/115 (6.1)                        |
| Perforation (clinically relevant)          | 3/115 (2.6)                        |
| Migration                                  | 2/113 (1.8)                        |
| Obstruction                                | 1/113 (0.9)                        |
| Rectal/abdominal pain                      | 1/113 (0.9)                        |
| <b>SEMS-related perforation</b>            | 9/112 (8.0)                        |
| Clinically relevant                        | 3/115 (2.6)                        |
| Perforation observed during resection      | 4/115 (3.5)                        |
| Micro perforation in histological specimen | 2/107 (1.9)                        |

SEMS = self-expandable metal stent, BTS = bridge to surgery

**eTable 4. Sub analysis of either blowhole or double loop DS versus SEMS patients in propensity-score matched samples.**

|                                                                               | <b>DS as BTS<br/>N = 121 (%)</b> | <b>SEMS as BTS<br/>N = 121 (%)</b> | <b>cOR</b> | <b>95% CI</b> | <b>P</b> |
|-------------------------------------------------------------------------------|----------------------------------|------------------------------------|------------|---------------|----------|
| <b>Type of DS</b>                                                             |                                  |                                    |            |               | -        |
| Double loop DS                                                                | 100/113 (88.5)                   | -                                  | -          | -             |          |
| Blowhole DS                                                                   | 13/113 (11.5)                    | -                                  | -          | -             |          |
| <b>Hospital stay during BTS interval, median (IQR), days</b>                  |                                  |                                    |            |               |          |
| Directly after DS/SEMS without readmissions                                   |                                  |                                    |            |               |          |
| Double loop DS                                                                | 7.0 (5.0-10.8)                   | 4.0 (2.0-6.0)                      | 0.88       | 0.81-0.94     | <0.001   |
| Blowhole DS                                                                   | 9.0 (5.5-13.5)                   | 4.0 (2.0-6.0)                      | 0.48       | 0.25-0.92     | 0.03     |
| Readmission during BTS interval                                               |                                  |                                    |            |               |          |
| Double loop DS                                                                | 1/93 (1.1)                       | 1/113 (0.9)                        | _*         | _*            | 1.00*    |
| Blowhole DS                                                                   | 0/12 (0.0)                       | 1/113 (0.9)                        | **         | **            | **       |
| Including readmissions during BTS interval                                    |                                  |                                    |            |               |          |
| Double loop DS                                                                | 7.0 (5.0-10.8)                   | 4.0 (2.0-6.0)                      | 0.88       | 0.81-0.94     | <0.001   |
| Blowhole DS                                                                   | 9.0 (5.5-13.5)                   | 4.0 (2.0-6.0)                      | 0.60       | 0.39-0.92     | 0.02     |
| <b>Hospital stay directly after resection, median (IQR), days<sup>a</sup></b> |                                  |                                    |            |               |          |
| Double loop DS                                                                | 6.0 (5.0-9.0)                    | 7.0 (5.0-14.0)                     | 1.04       | 1.00-1.09     | 0.03     |
| Blowhole DS                                                                   | 8.0 (6.5-16.5)                   | 7.0 (5.0-14.0)                     | 1.01       | 0.96-1.06     | 0.69     |
| <b>Total hospital stay, median (IQR), days<sup>b</sup></b>                    |                                  |                                    |            |               |          |
| Double loop DS                                                                | 14.5 (11.0-21.0)                 | 13.0 (9.0-20.0)                    | 0.99       | 0.96-1.01     | 0.35     |
| Blowhole DS                                                                   | 23.0 (17.0-34.0)                 | 13.0 (9.0-20.0)                    | 0.99       | 0.95-1.03     | 0.60     |

DS = decompressing stoma, SEMS = self-expandable metal stent, BTS = bridge to surgery, IQR = interquartile range, cOR = conditional odds ratio, CI = confidence interval

<sup>a</sup> Without readmissions

<sup>b</sup> Combination of hospital stay during BTS interval including readmissions and hospital stay after resection including readmissions\* McNemar test instead of conditional logistic regression due to < 5 observations, therefore no cOR and 95% confidence interval reported

\*\* Due to 0 observations in one or both group(s), no P-value could be calculated with the McNemar test

**eTable 5. Comparison of SEMS patients in high-volume versus low-volume SEMS centers.**

|                                                  | High-volume center<br>N = 50 (%) | Low-volume center<br>N = 71 (%) | P    |
|--------------------------------------------------|----------------------------------|---------------------------------|------|
| <b>Technical success</b>                         | 45/50 (90.0)                     | 57/69 (82.6)                    | 0.30 |
| <b>SEMS-related complication</b>                 | 1/48 (2.1)                       | 7/67 (10.4)                     | 0.14 |
| <b>SEMS-related perforation</b>                  | 2/49 (4.1)                       | 7/63 (11.1)                     | 0.29 |
| Clinically overt perforation                     | 1/48 (2.1)                       | 2/66 (3.0)                      | 1.00 |
| <b>3-year locoregional recurrence (%)</b>        | 16.7                             | 14.7                            | 0.57 |
| Number of events after 36 months of FU           | 7                                | 20                              |      |
| Number of patients at risk after 36 months of FU | 27                               | 81                              |      |
| <b>3-year disease free survival (%)</b>          | 66.5                             | 58.4                            | 0.53 |
| Number of events after 36 months of FU           | 15                               | 64                              |      |
| Number of patients at risk after 36 months of FU | 25                               | 70                              |      |
| <b>3-year overall survival (%)</b>               | 84.4                             | 72.0                            | 0.54 |
| Number of events after 36 months of FU           | 7                                | 41                              |      |
| Number of patients at risk after 36 months of FU | 30                               | 86                              |      |

SEMS = self-expandable metal stent, FU = follow-up

**eFigure 1.** Disease free survival (2A) and overall survival (2B) for DS versus SEMS as BTS, truncated at a third of patients at risk (propensity-score matched samples).  
**2A**

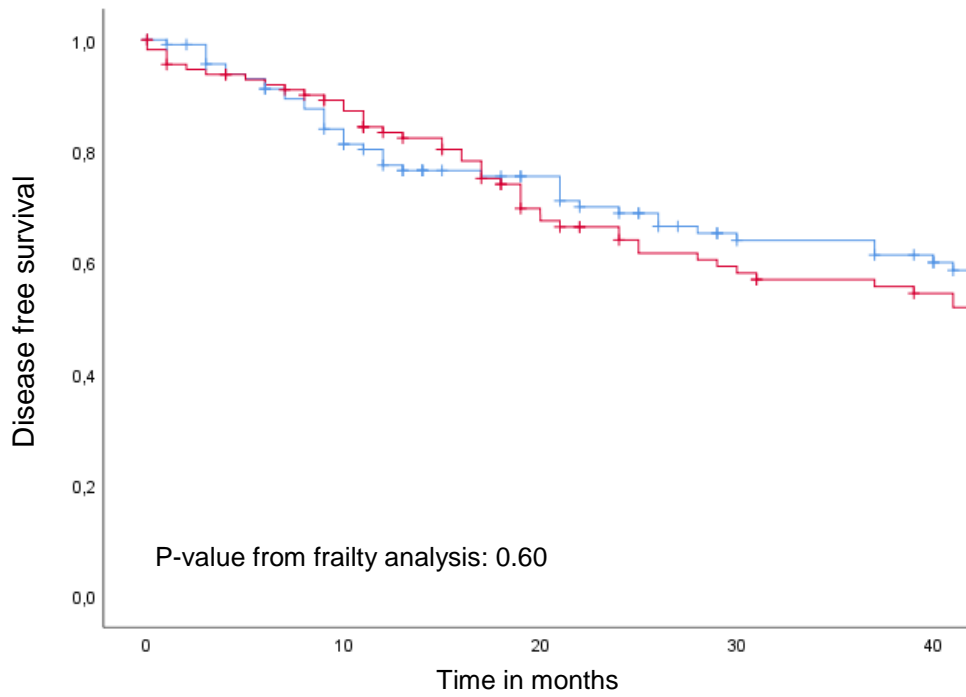

**Number at risk**  
 DS  
 SEMS

|      |     |    |    |    |    |
|------|-----|----|----|----|----|
|      | 116 | 91 | 69 | 50 | 44 |
| DS   | 116 | 91 | 69 | 50 | 44 |
| SEMS | 113 | 92 | 62 | 49 | 43 |

**2B**

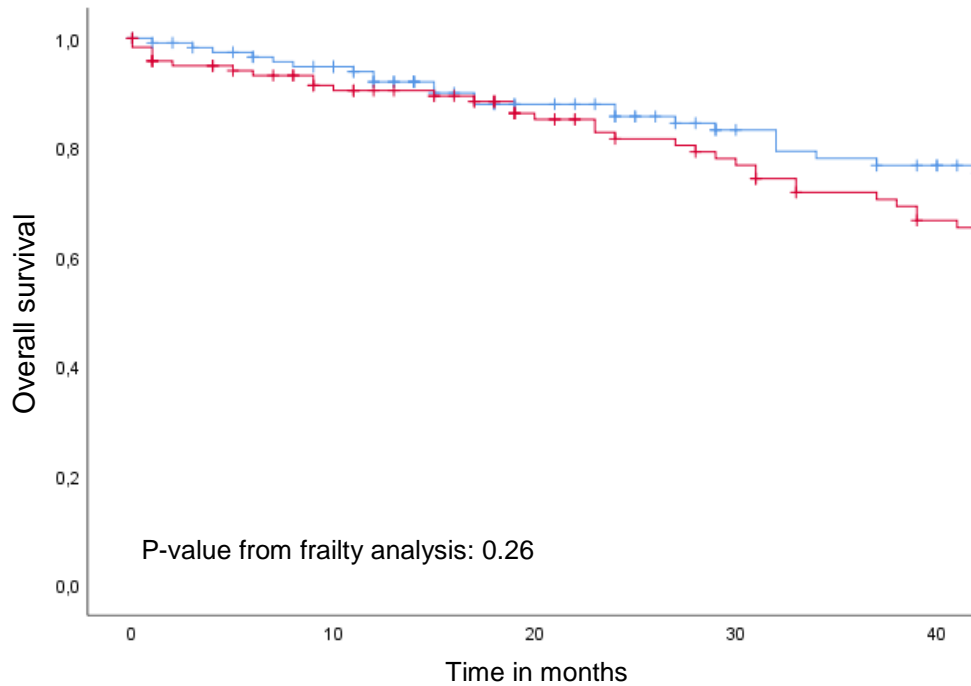

**Number at risk**  
 DS  
 SEMS

|      |     |     |    |    |    |
|------|-----|-----|----|----|----|
|      | 119 | 105 | 81 | 64 | 56 |
| DS   | 119 | 105 | 81 | 64 | 56 |
| SEMS | 120 | 97  | 76 | 63 | 51 |

**eFigure 2. Stoma-free survival after resection for DS versus SEMS as BTS (propensity-score matched).**

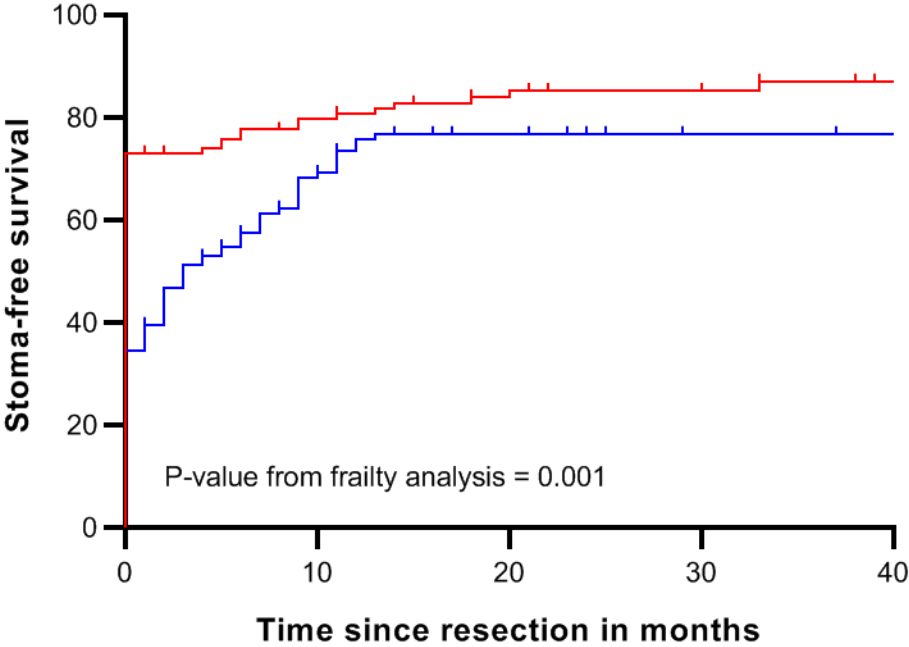

| Number at risk |     |    |    |    |   |
|----------------|-----|----|----|----|---|
| DS             | 116 | 32 | 16 | 10 | 9 |
| SEMS           | 119 | 22 | 13 | 9  | 5 |



**eFigure 3. Flowchart of patients with a stoma in situ directly after resection.**

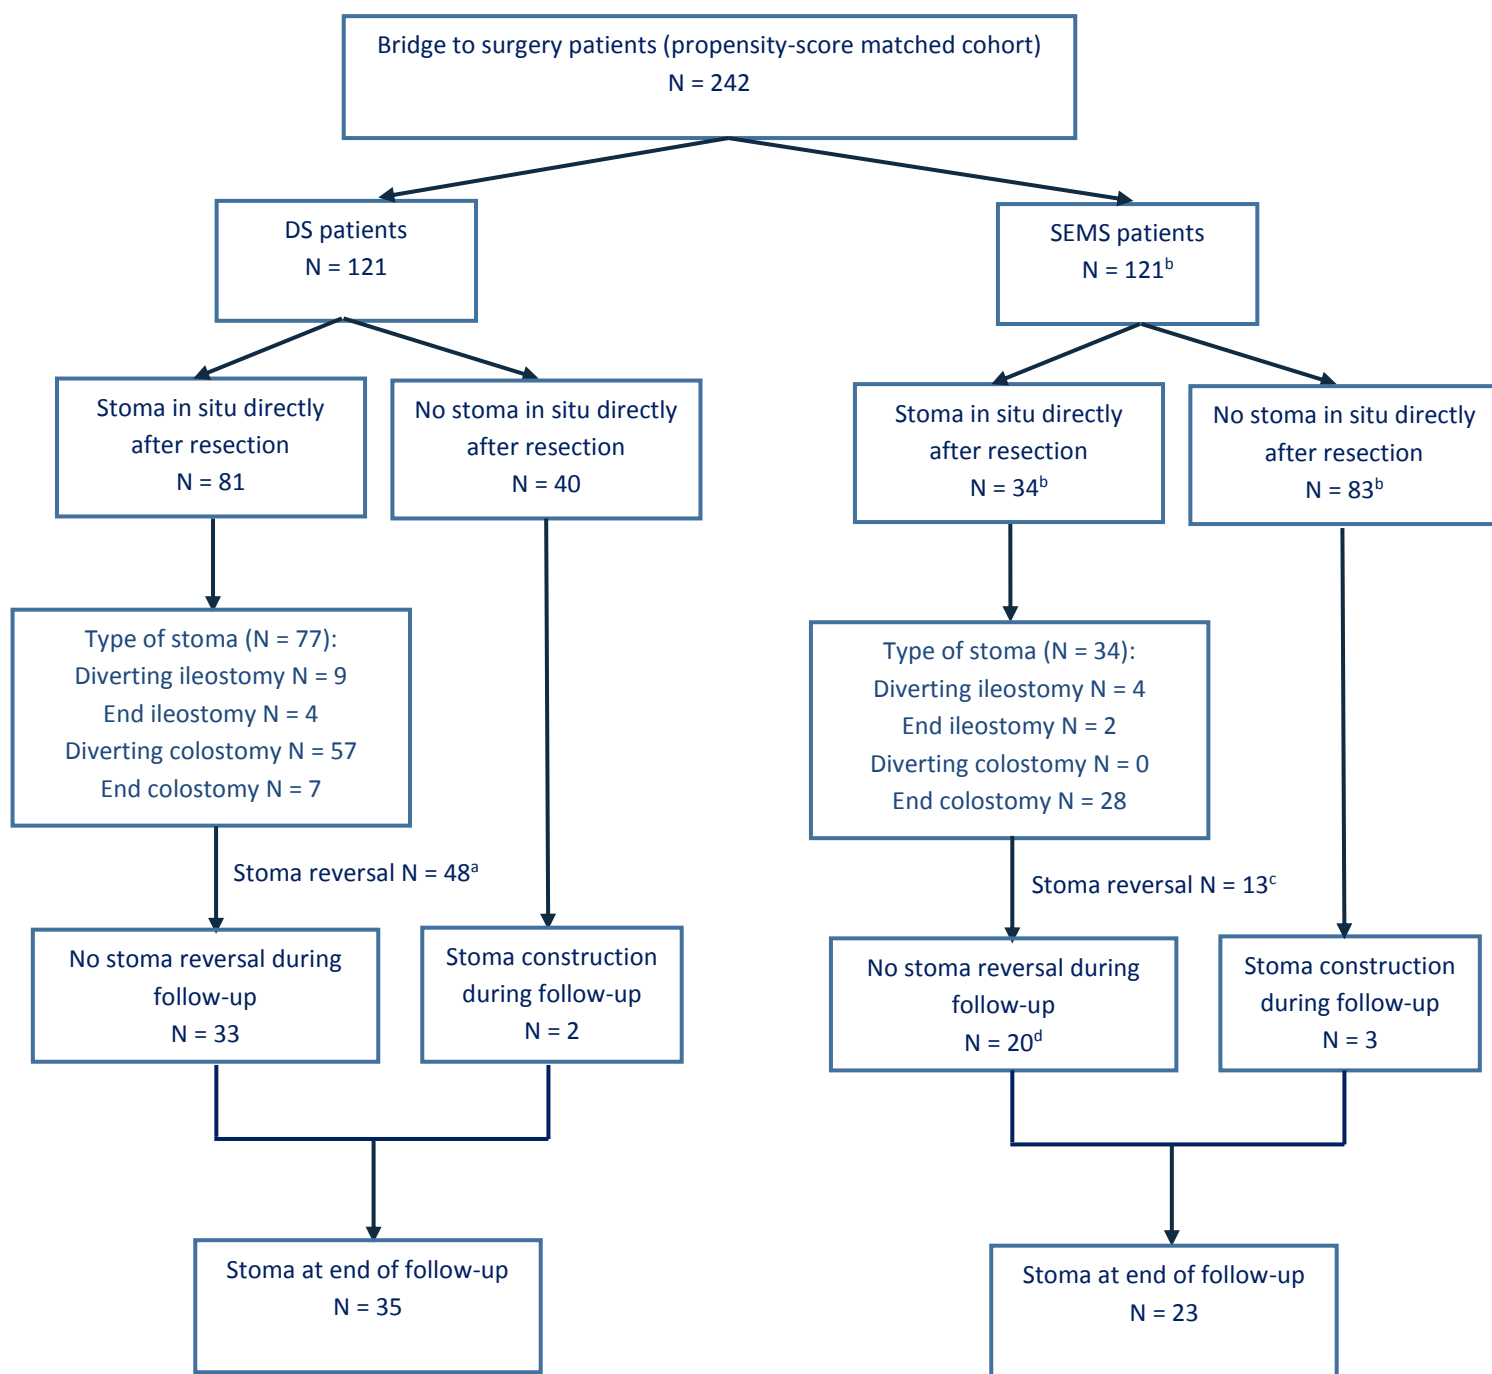

DS = decompressing stoma, SEMS = self-expandable metal stent

<sup>a</sup> Median time from primary tumor resection to stoma reversal (interquartile range): 4.5 months (2.0-9.0)

<sup>b</sup> In 4 SEMS patients, it was unknown if they had a stoma constructed directly after resection

<sup>c</sup> Median time from primary tumor resection to stoma reversal (interquartile range): 9.0 months (5.0-16.0)

<sup>d</sup> In 1 SEMS patient, it was unknown if the stoma was reversed during follow-up

**eFigure 4. Disease free survival (3A) and overall survival (3B) following SEMS placement for high-volume versus low-volume SEMS centers.**

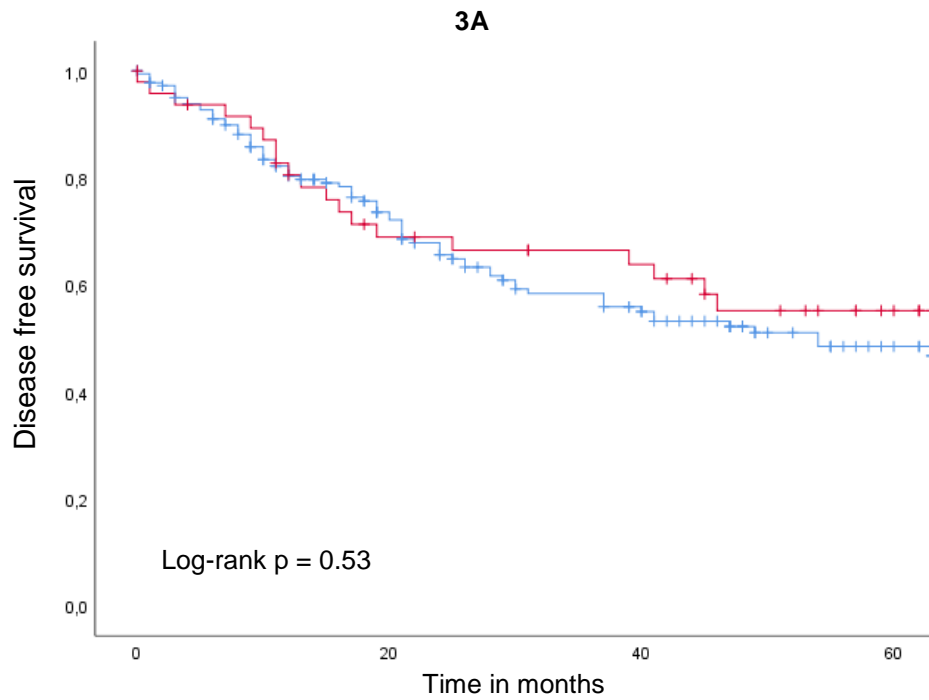

**Number at risk**  
 Low-volume  
 High-volume

|     |     |    |    |
|-----|-----|----|----|
| 182 | 102 | 63 | 30 |
| 47  | 29  | 24 | 11 |

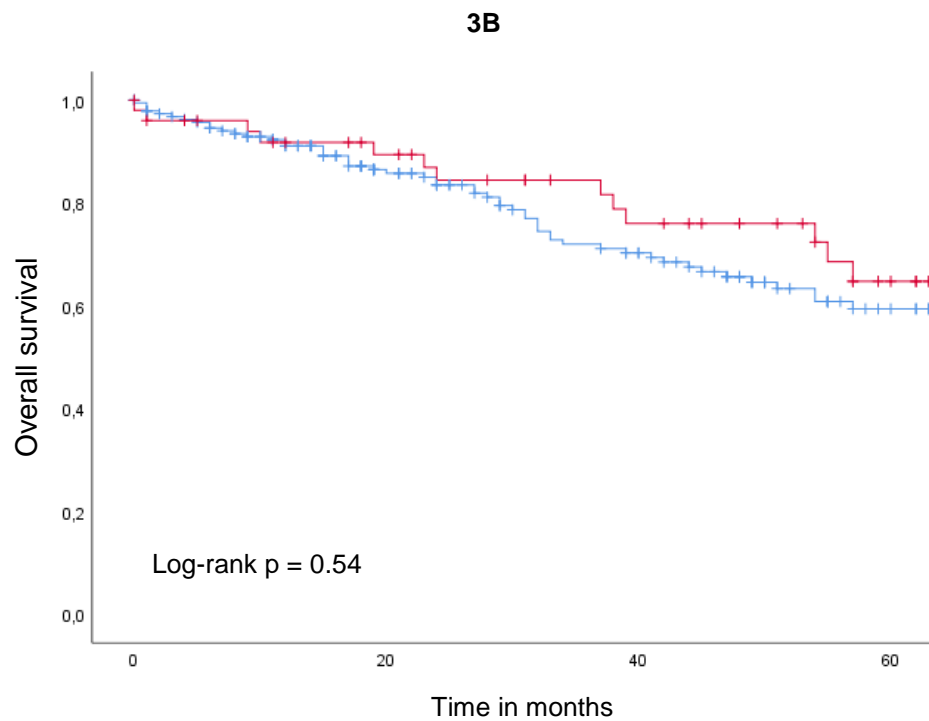

**Number at risk**  
 Low-volume  
 High-volume

|     |     |    |    |
|-----|-----|----|----|
| 189 | 119 | 80 | 38 |
| 50  | 38  | 27 | 13 |
